# Supplementary material for: Sociodemographic Factors, Nutritional Status, and Inflammatory Markers in Patients with Postural Orthostatic Tachycardia Syndrome
Source: Hindawi journal article supplement (doi:10.1155/2023/3992718), 2023-03-17
Supplement: f1 [file 3992718.f1.docx]

POTS, total

n=332

The present study

n=43

POTS sub-study

n=93

SYSTEMA cohort

n=3083
