# Supplementary material for: Sociodemographic Factors, Nutritional Status, and Inflammatory Markers in Patients with Postural Orthostatic Tachycardia Syndrome
Source: Hindawi journal article supplement (doi:10.1155/2023/3992718), 2023-03-17
Supplement: f2 [file 3992718.f2.docx]

**Supplementary Table 1**. Medication in the group of postural orthostatic tachycardia syndrome

|  |  | **Healthy controls N=61** | **POTS**  **N=43** |
| --- | --- | --- | --- |
| **Asthma and allergy** |  |  |  |
|  | Histamine H1-blockers | 2 | 13 |
|  | Inhaled β2-agonists | 0 | 7 |
|  | Leukotriene receptor agonists | 0 | 5 |
|  | Inhaled steroids | 0 | 4 |
|  | Sodium Cromoglicate | 0 | 3 |
|  | Nasal steroids | 1 | 2 |
|  | Inhaled ipratropiumbromide | 0 | 1 |
|  | Oral budesonide | 0 | 1 |
|  | Eye drops | 1 | 0 |
|  | Topical steroids | 1 | 0 |
| **Hormonal drugs** |  |  |  |
|  | Combined hormonal contraceptives | 3 | 8 |
|  | Progesterone | 1 | 6 |
|  | Thyroid hormones | 0 | 5 |
|  | GLP-1-analogs | 0 | 1 |
| **Antidepressants and mood stabilizers** |  |  |  |
|  | Selective serotonin reuptake inhibitor | 2 (of which one cyclic due to PMS) | 7 |
|  | Serotonin and noradrenaline reuptake inhibitors | 0 | 3 |
|  | Noradrenaline reuptake inhibitors | 0 | 3 |
|  | Antiepileptic drugs | 0 | 2 |
|  | Tricyclic antidepressants | 0 | 2 |
|  | Other antidepressants | 0 | 1 |
| **Tranquilizers** |  |  |  |
|  | Non-benzodiazepines | 0 | 3 |
|  | Benzodiazepines | 0 | 1 |
| **Sleeping pills** |  |  |  |
|  | Melatonin | 1 | 4 |
|  | Benzodiaepine-like | 1 | 2 |
|  | Others | 0 | 3 |
| **Pain killers** |  |  |  |
|  | Acetaminophen | 1 | 6 |
|  | Opioids and opioid-like drugs | 0 | 5 |
|  | **Non-steroidal Anti-Inflammatory Drugs** | 1 | 3 |
|  | Muscle relaxing agents | 0 | 2 |
|  | Gabapentinoids | 0 | 2 |
|  | Spasmolytics | 0 | 1 |
| **Vitamin and mineral supplementation** |  |  |  |
|  | B12 (oral or injected) | 0 | 6 |
|  | D-vitamins | 0 | 4 |
|  | Multivitamins | 2 | 3 |
|  | Folic acid | 0 | 2 |
|  | Potassium chloride | 0 | 1 |
|  | Magnesium | 0 | 1 |
|  | Sodium chloride tablets | 0 | 1 |
| **Cardiovascular and POTS-related drugs** |  |  |  |
|  | Antihypotensive agents | 0 | 17 |
|  | Ivabradine I(f) receptor inhibitors | 0 | 16 |
|  | Beta blockers | 0 | 13 |
|  | Central stimulating agents | 0 | 8 |
|  | Cholinesterase inhibitors | 0 | 6 |
|  | Mineral corticoids | 0 | 3 |
|  | Short acting nitroglycerine | 0 | 3 |
|  | Calcium channel blockers | 0 | 2 |
|  | Angiotensin receptor blockers | 0 | 1 |
| **Gastrointestinal drugs** |  |  |  |
|  | Histamine H2-blockers | 0 | 7 |
|  | Proton pump inhibitors | 1 | 2 |
|  | 5HT3-antagonists | 0 | 2 |
|  | 5HT4-antagonists | 0 | 2 |
|  | Laxatives | 0 | 1 |
|  | Bulking agents | 1 | 0 |
| **Miscellaneous** |  |  |  |
|  | Triptans | 0 | 2 |
|  | Statins | 0 | 2 |
|  | Anti-TNF | 0 | 1 |
|  | Direct oral anticoagulants | 0 | 1 |
